# Supplementary material for: The impact of sleep quality on body weight among young adults: A cross-sectional study
Source: Research Square preprint supplement (doi:10.21203/rs.3.rs-7448615/v1), 2025-09-12
Supplement: Supplementary file 1 [file 150f81d709ab477e900d081c.docx]

**Survey Tool**

Title: The Relationship between Sleep Duration, Quality, and Body Mass Index among Young Adults

This survey is about sleep and obesity. We are interested in finding out the Relationship between Sleep Duration, Quality, and Body Mass Index among Young Adults. Your answers are important. There are no right or wrong answers.All your responses will be kept private.

We would appreciate it if you could answer all your questions. Your participation is very important to us, and by telling us about your experiences, you will help to add to our knowledge.

|  | | | |
| --- | --- | --- | --- |
| 1. | Your age? | ________________years |  |
| 2. | How much schooling have you had? (Years of formal schooling completed) | [1] = No formal education  [3] = Secondary level  [5] = Graduation  [7] = Others | [2] = Primary level  [4] =Higher Secondary  [6] =Post Graduation |
| **[If you select others, please specify below:**  **______________________________________** | |
| 3. | Your MAIN occupation? | [1] =Student  [3] = Govt. employee  [5] = Self-employed  [7] = Others | [2] = Housewife  [4] =Private employee  [6] = Unemployed |
| **If you select others, please specify below:** | |
| 4. | Total number of family members | ________________ |  |
| 5. | Type of family | [1] = Nuclear | [2] = Extended |
| 6. | Your monthly family income? | [1] = Less than 20000 BDT  [3] = 30000-40000 BDT  [5] =Preferred not to say | [2] =20000-30000BDT  [4] =More than 40000 BDT |
| 7. | Your Place of residence? | [1] = Urban | [2] = Rural |
| 8. | Your religion? | [1] = Islam  [3] = Christianity | [2] = Hinduism  [4] = Buddhism  [5] = Others |
| 9. | Your ethnicity? | [1] = Bengali | [2] = other |
| 10. | Your Marital Status? | [1] = Unmarried | [2] = Married  [3] = Others |

**Dietary Habits**

|  |  | No | Yes, sometimes | Yes, often | Yes, every day |
| --- | --- | --- | --- | --- | --- |
| 11. | Do you eat fruits or vegetables as snacks? | [1] | [2] | [3] | [4] |
| 12. | How many servings of fruit do you eat each day? | ___________ servings | | | |
| 13. | Do you eat more than one kind of fruit each day? | [1] | [2] | [3] | [4] |
| 14. | Do you eat more than one kind of vegetable each day? |  |  |  |  |
| 15. | How many servings of vegetables do you eat each day? | ___________ servings | | | |
| 16. | Do you take snacks from home to work/study? | [1] | [2] | [3] | [4] |
| 17. | Do you eat fast food for lunch? | [1] | [2] | [3] | [4] |
| 18. | Do you eat snacks between meals? | [1] | [2] | [3] | [4] |
| 19. | Do you skip breakfast? | [1] | [2] | [3] | [4] |
| 20. | Do you drink regular soda? | [1] | [2] | [3] | [4] |
| 21. | Do you drink fruit drinks, punch, or energy drinks | [1] | [2] | [3] | [4] |
| 22. | Do you eat other purchased prepared food (not fast food) often (e.g., restaurant food) | [1] | [2] | [3] | [4] |

| 23. | Not at all | Sometimes | Often | Always |
| --- | --- | --- | --- | --- |
| To what extent do your friends influence your eating habits? |  |  |  |  |
| How often do you eat meals with friends or family? |  |  |  |  |
| How often does campus food availability (e.g., canteens, vending machines, delivery) affect your eating habits? |  |  |  |  |
| How much do cultural expectations (e.g., body ideals, food traditions) affect your eating patterns? |  |  |  |  |

**Physical activity patterns (the time you spent being physically active in the LAST 7 DAYS)**

| 24 |  | Not at all/not applicable | Once or twice a week | Most days | Everyday |
| --- | --- | --- | --- | --- | --- |
|  | On how many of the last seven days did you do **vigorous** physical activities like heavy lifting, digging, aerobics, or fast bicycling?  Think about *only* those physical activities that you did for at least **10 minutes** at a time. | [1] | [2] | [3] | [4] |
|  | During the last 7 days, how many days did you do **moderate** physical activities like carrying light loads or bicycling at a regular pace? Think onlyabout those physical activities that you did for at least 10 minutes at a time. **Do not include walking** | [1] | [2] | [3] | [4] |
|  | On how many of the last seven days did you **walk** for at least 10 minutes at a time? This includes all types of walking at work and at home, walking to travel from place to place, and any other walking that you do. | [1] | [2] | [3] | [4] |
|  | The following question is about the time you spend **sitting** on weekdays while at work, at home, or any other place. This includes time spent sitting at a desk, visiting friends, travelling on a bus or sitting or lying down to watch television.  During the last 7 days, how much time in total did you usually spend *sitting* on a **weekday?** | __________hours __________minutes | | | |

| 25 | Yes | No | Not applicable |
| --- | --- | --- | --- |
| Does your institution provide resources that support healthy behaviours (e.g., gyms, counselling, wellness programs)? |  |  |  |
| Do you feel your academic environment promotes unhealthy habits such as sedentary lifestyles (e.g., long study hours)? |  |  |  |

## Sleep Habits

26. During the past month, what time have you usually gone to bed at night? ____________

27. During the past month, how long (in minutes) has it usually taken you to fall asleep each night?

____________

28. During the past month, what time have you usually gotten up in the morning? ____________

29. During the past month, how many hours of actual sleep did you get at night? (This may be different from the number of hours you spend in bed.)

____________

| 30. | Not at all | Sometimes | Often | Always |
| --- | --- | --- | --- | --- |
| Do your family members encourage or discourage healthy sleep routines (e.g., regular bedtime)? |  |  |  |  |
| To what extent do you feel peer pressure to stay up late (e.g., chatting, social media, group study)? |  |  |  |  |
| Does your academic workload affect your ability to sleep enough hours? |  |  |  |  |
| How often do you feel societal norms encourage “being busy” over maintaining a healthy lifestyle? |  |  |  |  |
| How much do you think the urban environment (traffic, noise, pollution) interferes with your sleep? |  |  |  |  |

31. During the past month, how often have you had trouble sleeping because you

|  | Not during the past month | Less than once a week | Once or twice a week | Three or more times a week |
| --- | --- | --- | --- | --- |
| Cannot get to sleep within 30 minutes? | 0 | 1 | 2 | 3 |
| Wake up in the middle of the night or early morning? |  |  |  |  |
| Have to get up to use the bathroom? |  |  |  |  |
| Cannot breathe comfortably? |  |  |  |  |
| Cough or snore loudly? |  |  |  |  |
| Feel too cold? |  |  |  |  |
| Feel too hot? |  |  |  |  |
| Have bad dreams? |  |  |  |  |
| Have pain? |  |  |  |  |

32. During the past month, how often have you had trouble sleeping because you

|  | Not during the past month | Less than once a week | Once or twice a week | Three or more times a week |
| --- | --- | --- | --- | --- |
| During the past month, how often have you taken medicine (prescribed or 'over the counter') to help you sleep? | 0 | 1 | 2 | 3 |
| During the past month, how often have you had trouble staying awake while driving, eating meals, or engaging in social activity? |  |  |  |  |
| During the past month, how much of a problem has it been for you to keep up the enthusiasm to get things done? |  |  |  |  |
| During the past month, how would you rate your sleep quality overall? |  |  |  |  |

| 33. | How much do you currently weigh? (without shoes or heavy clothes) | ________Kg | |
| --- | --- | --- | --- |
| 34. | How tall are you? (without shoes) | __________cm | |
| 35. | In your opinion, do you eat a healthy diet? | [1] = Yes, always  [3] = No | [2] = Sometimes  [4] = Not Sure |
| 36. | In your opinion, are you physically active? | [1] = Yes, always  [3] = No | [2] = Sometimes  [4] = Not Sure |
| 37. | What is your opinion about your own weight? | [1] =Underweight  [3] = Overweight | [2] = Normal  [4] = Obese |

Has any relevant information been missing?

Please fill out the space below if you have any further information you would like to share with us.

___________________________________________________________________

___________________________________________________________________

We appreciate your time to complete this questionnaire.
